# Supplementary material for: Effect of organic solvent and Brønsted acid on 5-hydroxymethylfurfural preparation from glucose over CrCl3
Source: Royal Society of Chemistry journal article supplement (doi:10.1039/c5ra02057c), 2015-01-01

## Effect of organic solvent and brönsted acid on 5-hydroxymethylfurfural preparation from glucose over $\text{CrCl}_3$

Yan Yang<sup>a</sup>, Wentao Liu<sup>a</sup>, Ningning Wang<sup>a</sup>, Haijun Wang<sup>a,\*</sup>, Zhanxin Song<sup>a</sup>,  
Wei Li<sup>a</sup>

<sup>a</sup> *The Key Laboratory of Food Colloids and Biotechnology, Ministry of Education, School  
of Chemical and Material Engineering, Jiangnan University, Wuxi 214122, Jiangsu,  
China.*

Corresponding Author E-mail: [wanghj329@outlook.com](mailto:wanghj329@outlook.com)

### Electronic Supplementary Information

#### Contents

- S1. IL characterization
- S2. Configurations of chromium(III) complexes
- S3. The optimized geometries of the intermediates and transition states

## S1. IL characterization

Figure S1. [NMP]HSO<sub>4</sub> <sup>1</sup>H NMR

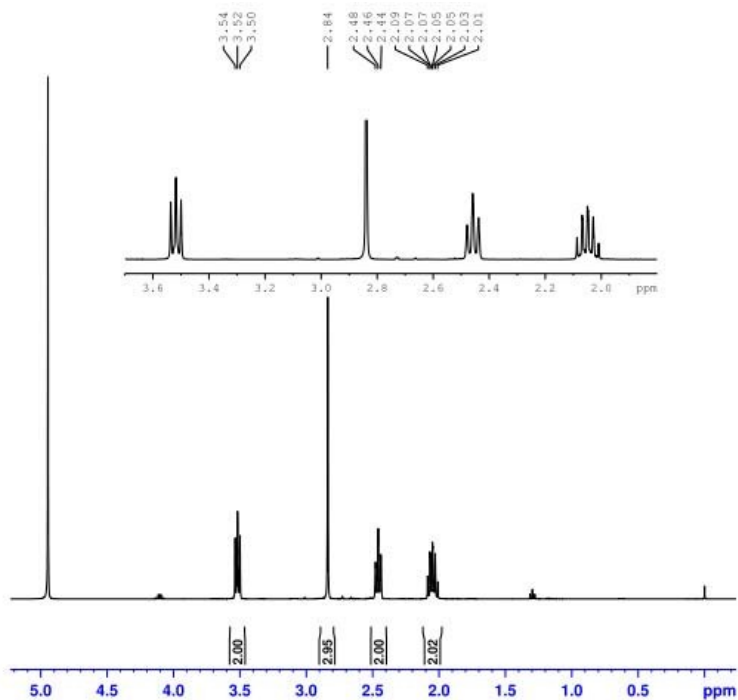

Figure S2. [NMP]HSO<sub>4</sub> IR

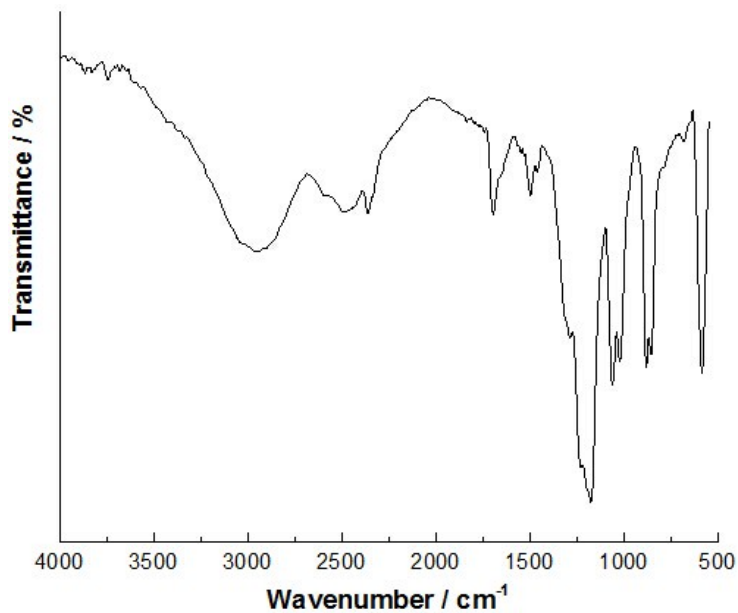

**Figure S3. [NMP]HSO<sub>4</sub> TGA**

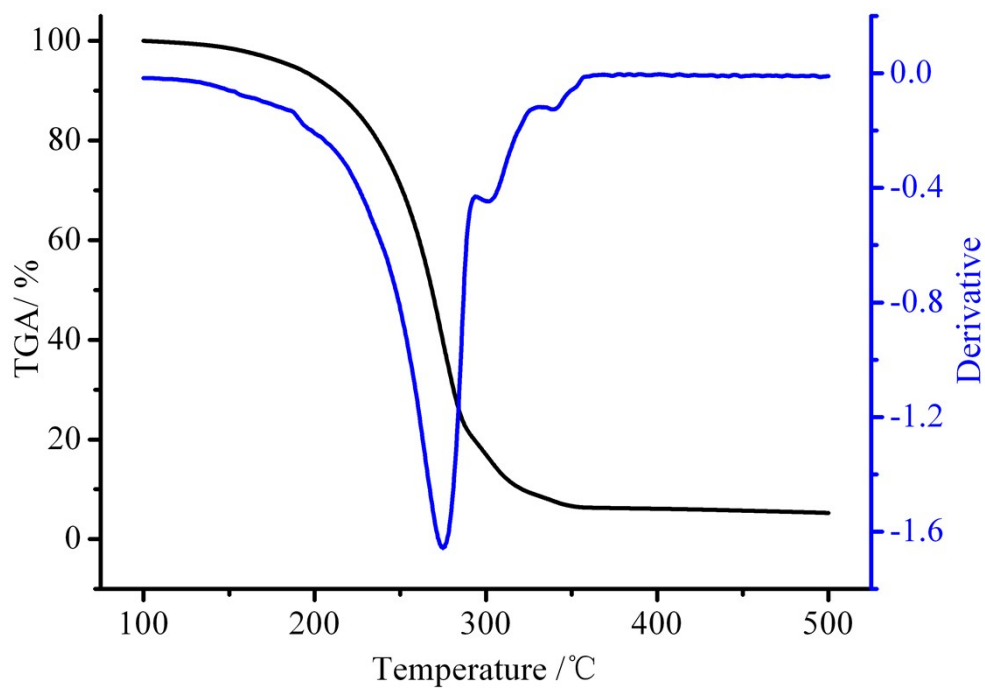

## **S2. Configurations of chromium(III) complexes**

**Figure S9. Configurations of chromium(III) complexes**

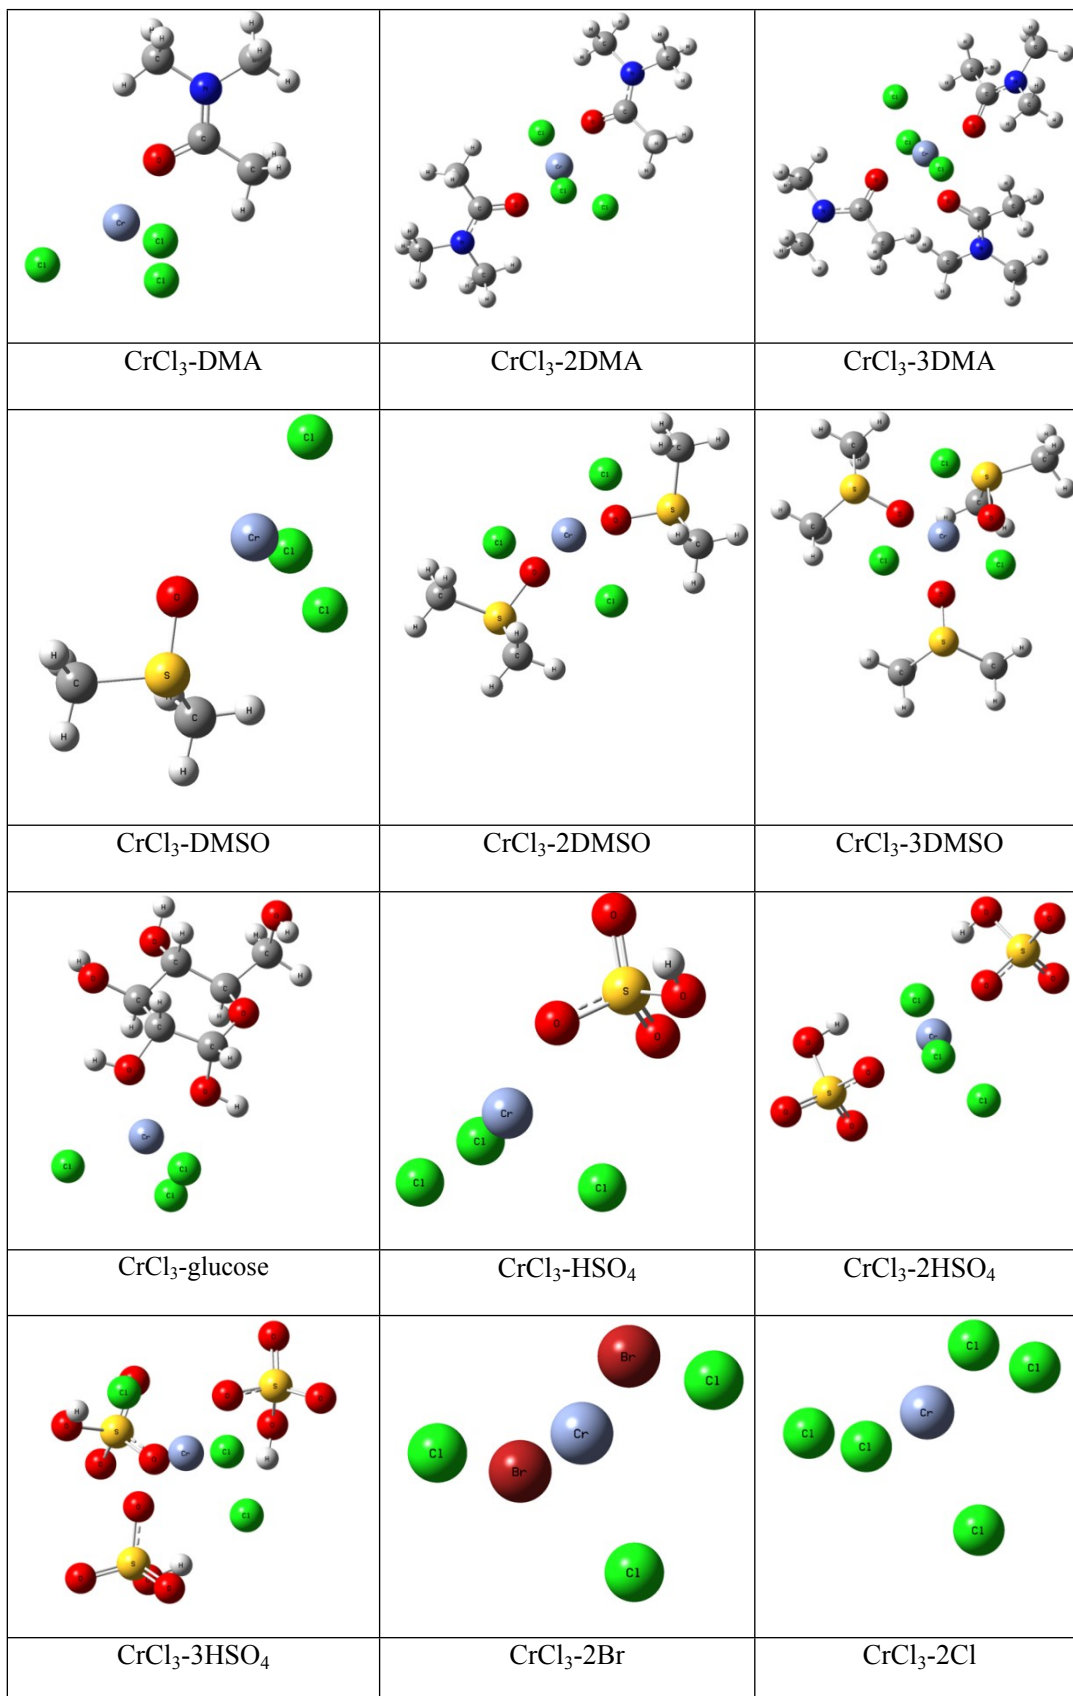

### S3. The optimized geometries of the intermediates and transition states

S3.1 Optimized geometries of the intermediates and transition states during glucose isomerization by  $\text{CrCl}_3$ .

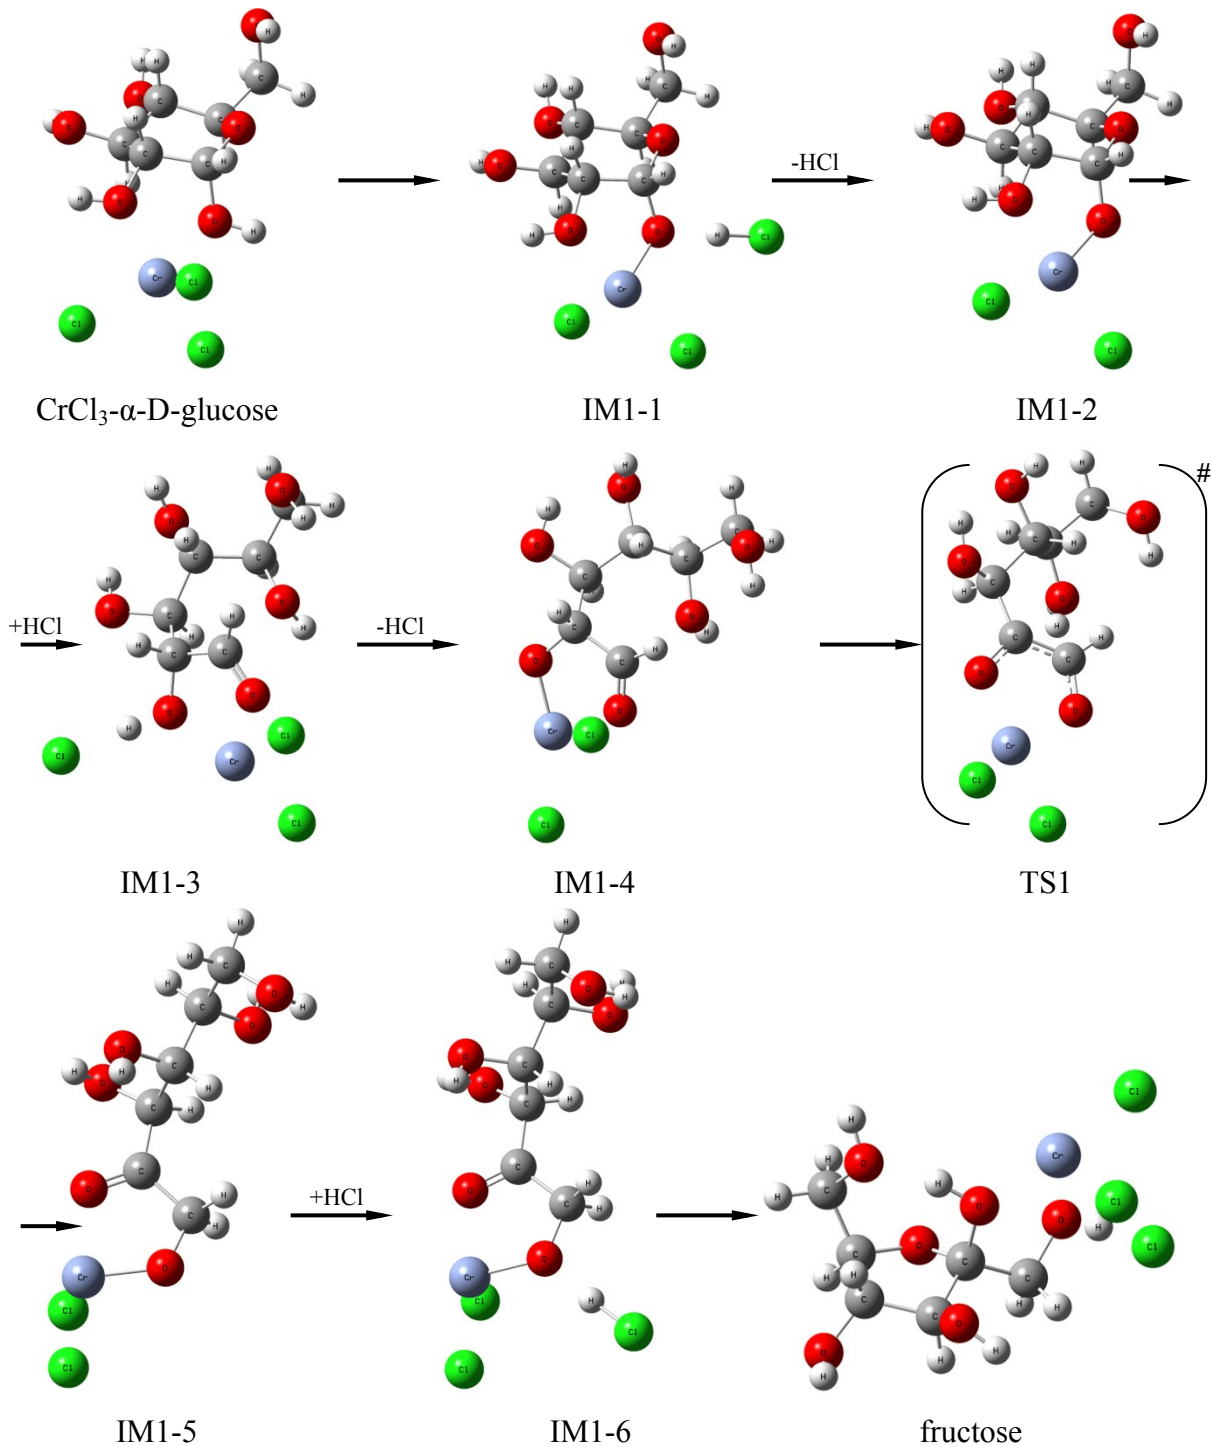

S3.2 Optimized geometries of the intermediates and transition states during glucose isomerization by  $\text{CrCl}_3$ -DMA

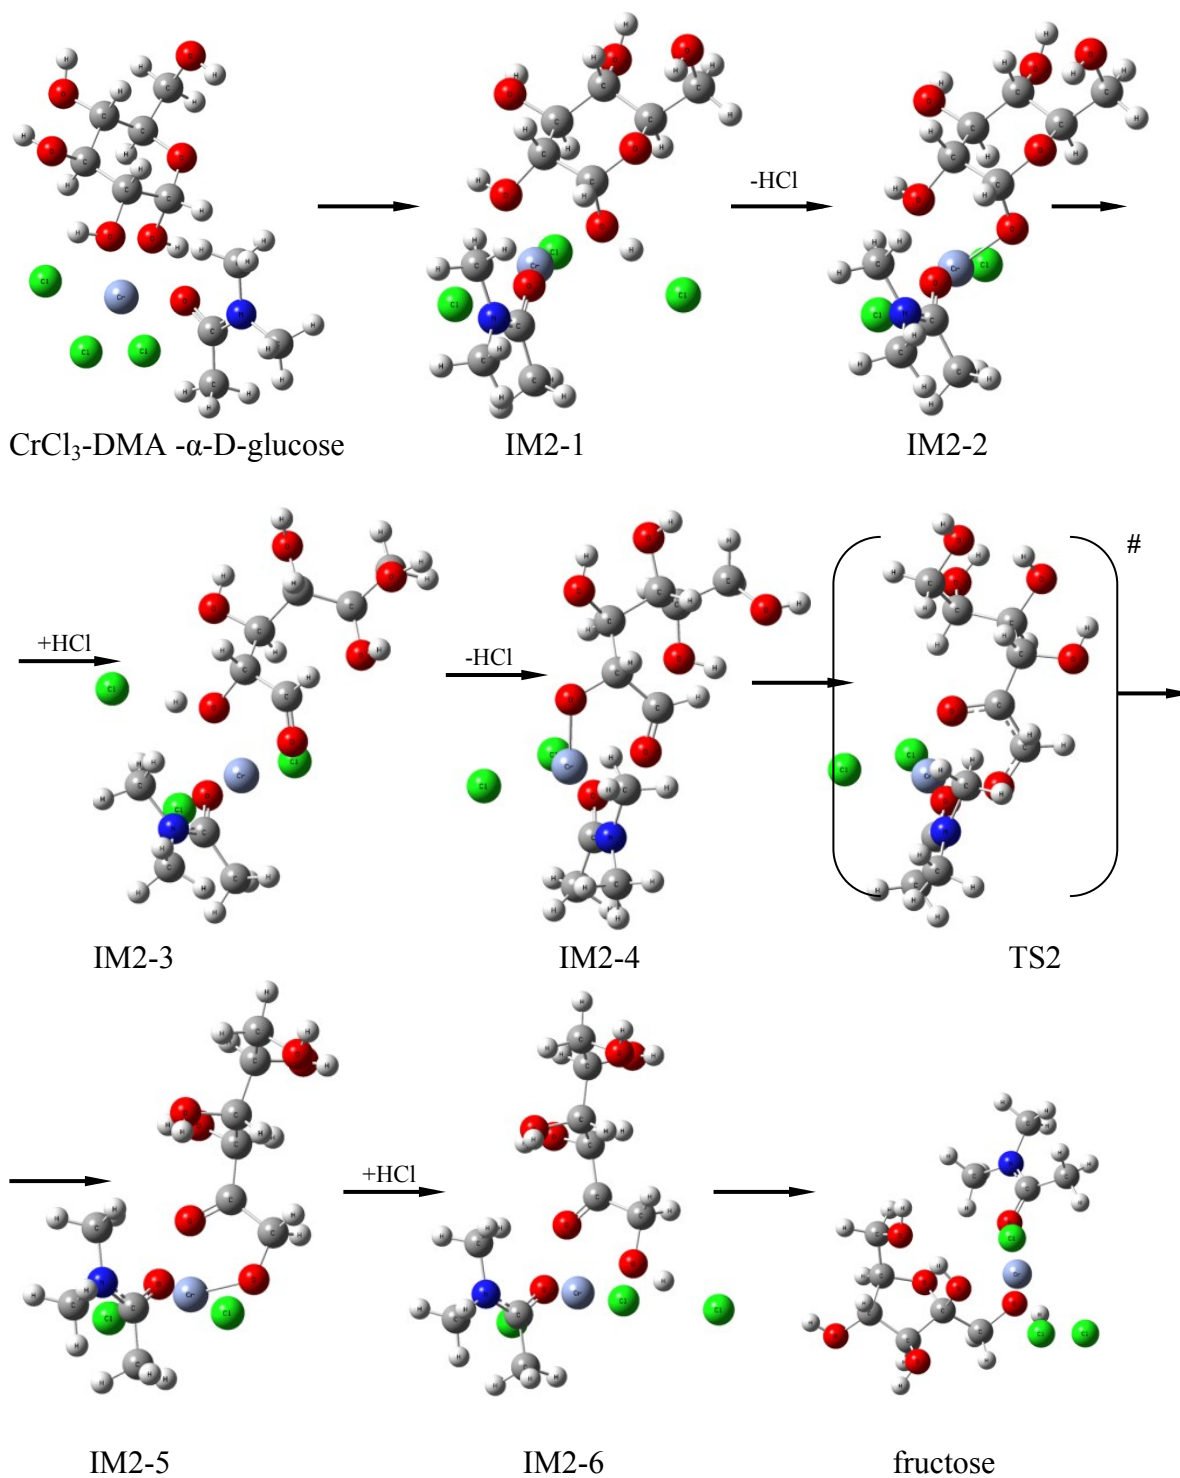

S3.3 Optimized geometries of the intermediates and transition states during glucose isomerization by  $\text{CrCl}_3\cdot 2\text{Br}$  in DMA

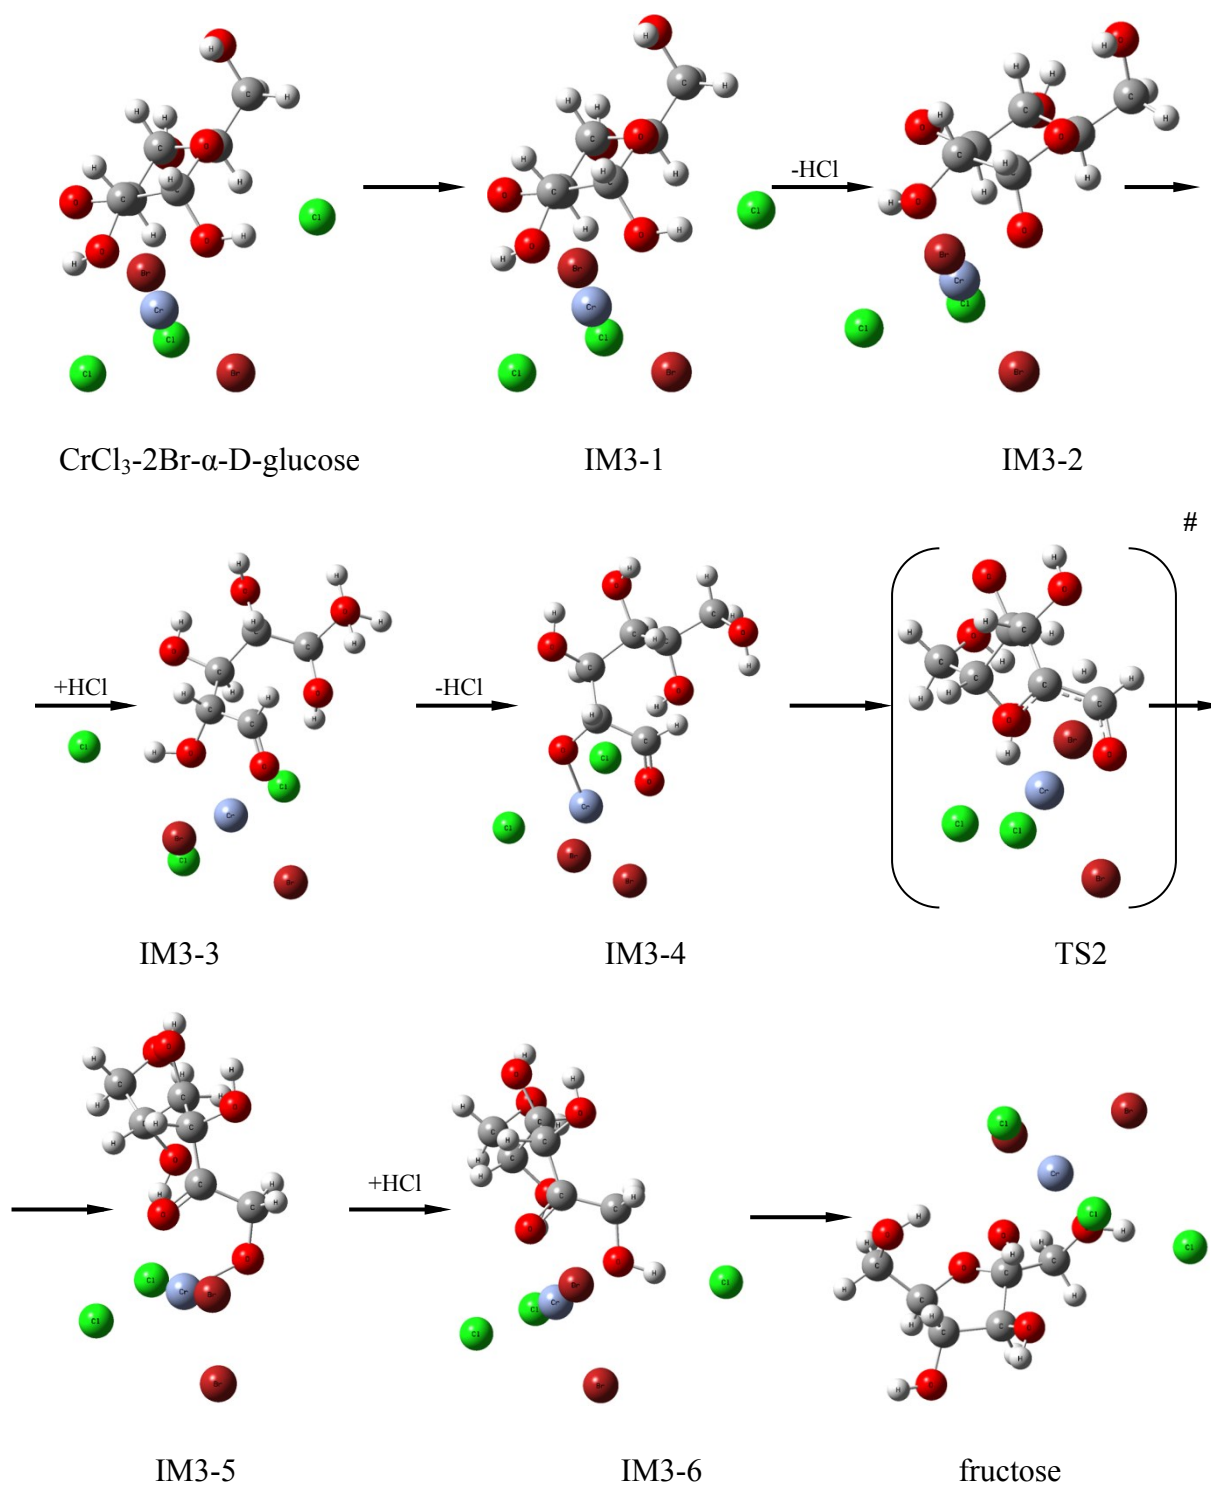

S3.4 Optimized geometries of the intermediates and transition states during glucose isomerization by  $\text{CrCl}_3\cdot 2\text{Cl}$  in DMA.

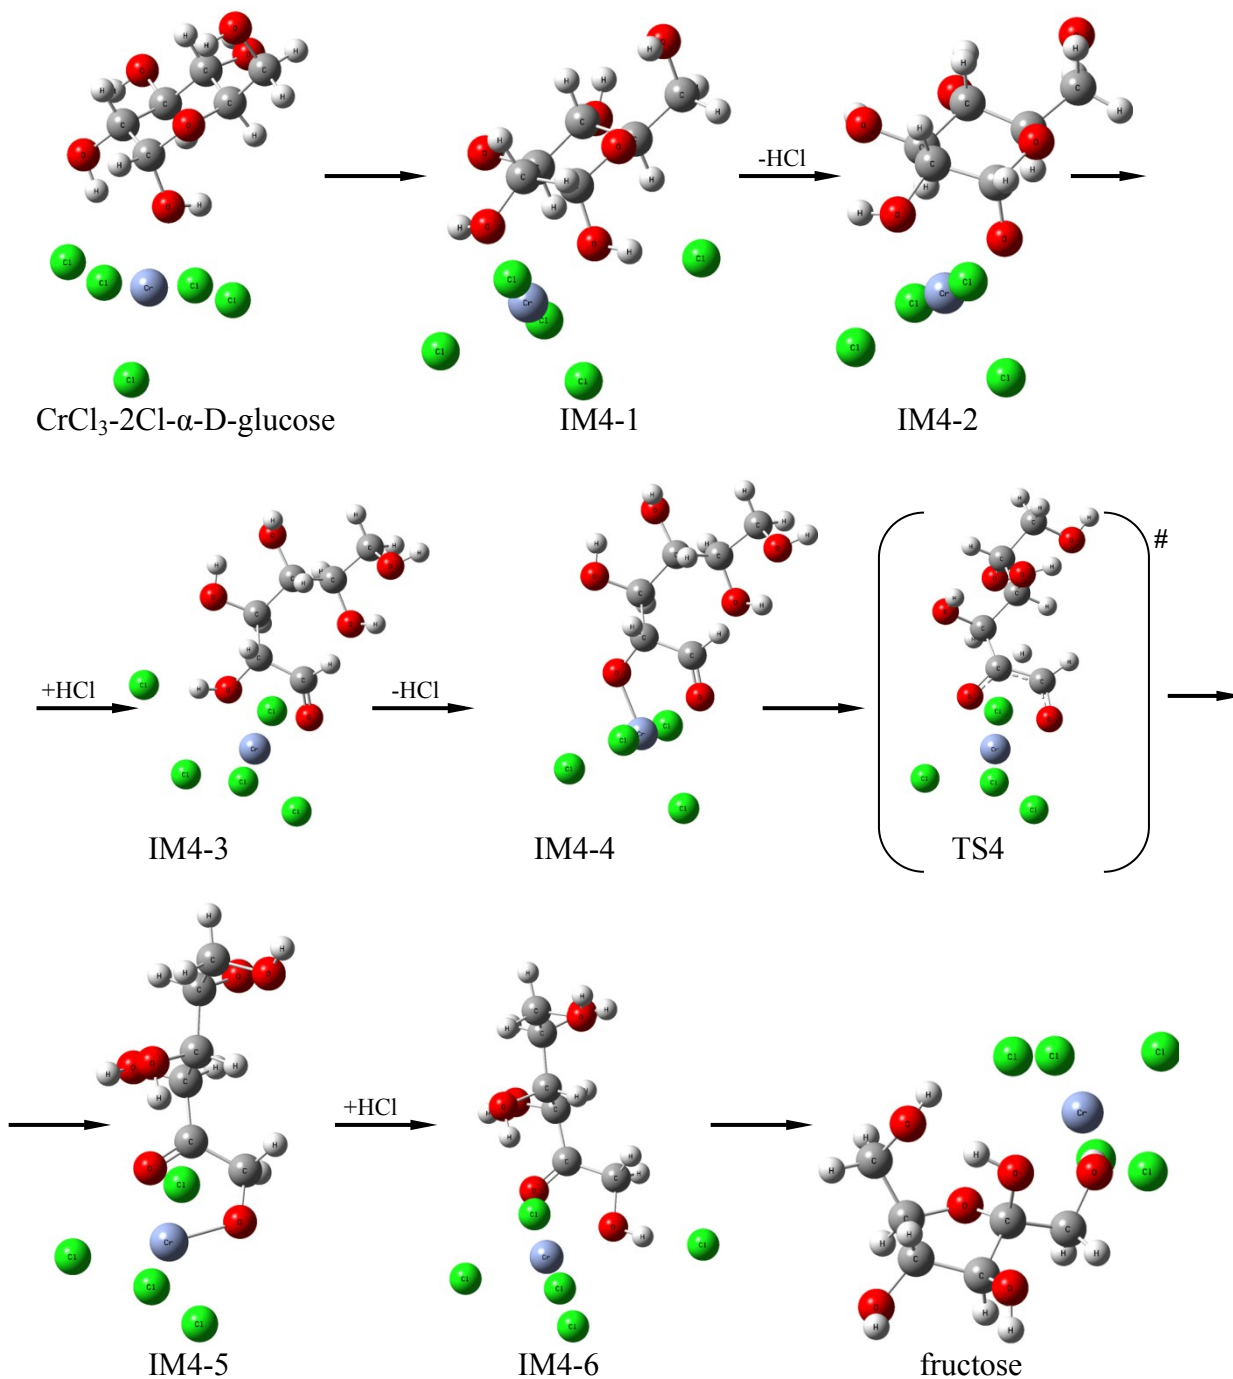

Supplement: c5ra02057c1.pdf [file c5ra02057c1.pdf]
